# Supplementary material
Source: PubMed Central journal article supplement (PMC3740959)
Supplement: NIHMS491911-supplement-Supplement1.pdf [file NIHMS491911-supplement-Supplement1.pdf]

## Supplementary Appendix

This appendix has been provided by the authors to give readers additional information about their work.

Supplement to: Peterson DC, Martin-Gill C, Guyette FX, et al. Outcomes of medical emergencies on commercial airline flights. *N Engl J Med* 2013;368:2075-83. DOI: 10.1056/NEJMoa1212052

# Outcomes of In-Flight Medical Emergencies Aboard Commercial Airlines

## APPENDIX

|                  |               |
|------------------|---------------|
| <b>Authors</b>   | <b>Page 1</b> |
| <b>Table S1</b>  | <b>Page 2</b> |
| <b>Table S2</b>  | <b>Page 3</b> |
| <b>Table S3</b>  | <b>Page 4</b> |
| <b>Reference</b> | <b>Page 5</b> |

Drew C. Peterson, MD, Christian Martin-Gill, MD, MPH, Francis X. Guyette, MD, MPH, Adam Z. Tobias, MD, MPH, Catherine E. McCarthy, BS, Scott T. Harrington, MD, Theodore R. Delbridge, MD, MPH, Donald M. Yealy, MD

**Table S1: In-Flight Medical Emergencies by Complaint and Airline**

| <b>Category</b>                | <b>Total IMEs</b> | <b>Airline 1</b> | <b>Airline 2</b> | <b>Airline 3</b> | <b>Airline 4</b> | <b>Airline 5</b> |
|--------------------------------|-------------------|------------------|------------------|------------------|------------------|------------------|
| TOTAL                          | 11920<br>(100%)   | 2933<br>(24.6%)  | 2476<br>(20.8%)  | 1254<br>(10.5%)  | 1006<br>(8.4%)   | 4251<br>(35.7%)  |
| Syncope                        | 4463<br>(37.4%)   | 1078<br>(36.8%)  | 782<br>(31.6%)   | 466<br>(37.2%)   | 199<br>(19.8%)   | 1938<br>(45.6%)  |
| Respiratory                    | 1447<br>(12.1%)   | 291<br>(9.9%)    | 195<br>(7.9%)    | 226<br>(18.0%)   | 70<br>(7.0%)     | 665<br>(15.6%)   |
| Nausea & Vomiting              | 1137<br>(9.5%)    | 341<br>(11.6%)   | 287<br>(11.6%)   | 134<br>(10.7%)   | 111<br>(11.0%)   | 264<br>(6.2%)    |
| Cardiac                        | 920<br>(7.7%)     | 241<br>(8.2%)    | 268<br>(10.8%)   | 54<br>(4.3%)     | 99<br>(9.8%)     | 258<br>(6.1%)    |
| Seizures                       | 689<br>(5.8%)     | 95<br>(3.2%)     | 170<br>(6.9%)    | 60<br>(4.8%)     | 60<br>(6.0%)     | 304<br>(7.2%)    |
| Abdominal Pain                 | 488<br>(4.1%)     | 159<br>(5.4%)    | 122<br>(4.9%)    | 45<br>(3.6%)     | 74<br>(7.4%)     | 88<br>(2.1%)     |
| Infectious Disease             | 330<br>(2.8%)     | 95<br>(3.2%)     | 87<br>(3.5%)     | 17<br>(1.4%)     | 91<br>(9.0%)     | 40<br>(0.9%)     |
| Agitated /<br>Psychiatric      | 287<br>(2.4%)     | 79<br>(2.7%)     | 65<br>(2.6%)     | 26<br>(2.1%)     | 38<br>(3.8%)     | 79<br>(1.9%)     |
| Allergic Reaction              | 265<br>(2.2%)     | 55<br>(1.9%)     | 68<br>(2.7%)     | 31<br>(2.5%)     | 32<br>(3.2%)     | 79<br>(1.9%)     |
| Possible Stroke                | 238<br>(2.0%)     | 41<br>(1.4%)     | 68<br>(2.7%)     | 23<br>(1.8%)     | 24<br>(2.4%)     | 82<br>(1.9%)     |
| Trauma NOS                     | 216<br>(1.8%)     | 66<br>(2.3%)     | 35<br>(1.4%)     | 37<br>(3.0%)     | 30<br>(3.0%)     | 48<br>(1.1%)     |
| Diabetic<br>Complication       | 193<br>(1.6%)     | 42<br>(1.4%)     | 49<br>(2.0%)     | 20<br>(1.6%)     | 12<br>(1.2%)     | 70<br>(1.6%)     |
| Headache                       | 123<br>(1.0%)     | 38<br>(1.3%)     | 24<br>(1.0%)     | 15<br>(1.2%)     | 15<br>(1.5%)     | 31<br>(0.7%)     |
| Extremity Pain /<br>Injury     | 114<br>(1.0%)     | 27<br>(0.9%)     | 30<br>(1.2%)     | 20<br>(1.6%)     | 14<br>(1.4%)     | 23<br>(0.5%)     |
| Obstetrical &<br>Gynecological | 61<br>(0.5%)      | 14<br>(0.5%)     | 21<br>(0.8%)     | 4<br>(0.3%)      | 8<br>(0.8%)      | 14<br>(0.3%)     |
| Ear Pain                       | 49<br>(0.4%)      | 12<br>(0.4%)     | 6<br>(0.2%)      | 5<br>(0.4%)      | 6<br>(0.6%)      | 20<br>(0.5%)     |
| Cardiac Arrest                 | 38<br>(0.3%)      | 9<br>(0.3%)      | 16<br>(0.6%)     | 1<br>(0.1%)      | 3<br>(0.3%)      | 9<br>(0.2%)      |
| Laceration                     | 33<br>(0.3%)      | 7<br>(0.2%)      | 7<br>(0.3%)      | 1<br>(0.1%)      | 7<br>(0.7%)      | 11<br>(0.3%)     |
| Other                          | 821<br>(6.9%)     | 239<br>(8.1%)    | 176<br>(7.1%)    | 67<br>(5.3%)     | 113<br>(11.2%)   | 226<br>(5.3%)    |
| Unknown                        | 8<br>(0.1%)       | 4<br>(0.1%)      | 0<br>(0.0%)      | 2<br>(0.2%)      | 0<br>(0.0%)      | 2<br>(0.0%)      |

Table S2: Medications Used During In-Flight Medical Emergencies (IMEs)

|                  | Number of times used | Percentage of time used during IMEs | Contained in FAA Mandated EMK <sup>1</sup> |
|------------------|----------------------|-------------------------------------|--------------------------------------------|
| Oxygen           | 5,954                | 49.9%                               | Yes                                        |
| Normal Saline    | 625                  | 5.2%                                | Yes                                        |
| Aspirin          | 595                  | 5.0%                                | Yes                                        |
| Nitroglycerin    | 354                  | 3.0%                                | Yes                                        |
| OTC Analgesic    | 311                  | 2.6%                                | Yes                                        |
| Anti-emetic      | 265                  | 2.2%                                | No                                         |
| Diphenhydramine  | 245                  | 2.1%                                | Yes                                        |
| Albuterol        | 128                  | 1.1%                                | Yes                                        |
| Anti-anxiety     | 62                   | 0.5%                                | No                                         |
| Morphine         | 43                   | 0.4%                                | No                                         |
| Epinephrine      | 39                   | 0.3%                                | Yes                                        |
| Dextrose/glucose | 17                   | 0.1%                                | Yes                                        |
| Atropine         | 13                   | 0.1%                                | Yes                                        |
| Nalbuphine       | 12                   | 0.1%                                | No                                         |
| Other            | 103                  | 0.9%                                | --                                         |
| None             | 4,815                | 40.4%                               | --                                         |
| Unknown          | 2                    | 0.02%                               | --                                         |

Table S3: Contents of Emergency Medical Kits (EMK)

| <u>Required contents of EMK<sup>1</sup></u>  |                                        |
|----------------------------------------------|----------------------------------------|
| Airways, oropharyngeal                       | Analgesic, non-narcotic                |
| Adhesive tape, 1-inch                        | Antihistamine, 50 mg, injectable       |
| Alcohol sponges                              | Antihistamine tablets, 25 mg           |
| CPR mask                                     | Aspirin tablets, 325 mg                |
| IV administration set                        | Atropine, 0.5 mg, 5 cc                 |
| Needles                                      | Bronchodilator, inhaled                |
| Protective gloves                            | Dextrose, 50% / 50 cc, injectable      |
| Sphygmomanometer                             | Epinephrine 1:1000, 1 cc, injectable   |
| Stethoscope                                  | Epinephrine 1:10,000, 2 ml, injectable |
| Syringes                                     | Lidocaine, 5 ml, 20 mg/ml, injectable  |
| Tape scissors                                | Nitroglycerine tablets                 |
| Tourniquet                                   | Saline solution, 500 cc                |
| Manual resuscitation device with 3 masks     |                                        |
| Basic instructions on use of the kit         |                                        |
| <u>Additional contents of enhanced EMKs*</u> |                                        |
| Burn dressings                               | Calcium chloride                       |
| Cord clamps                                  | Diazepam                               |
| Disposable scalpel                           | Digoxin                                |
| Endotracheal tubes                           | Glucose gel                            |
| Emergency tracheal catheter                  | Furosemide                             |
| Glucometer                                   | Lorazepam                              |
| Laryngoscope blade                           | Haloperidol                            |
| Steri-strips                                 | Hydrocortisone                         |
| Thermometer                                  | Meclizine                              |
| Tourniquet                                   | Methylprednisolone                     |
| Urinary catheter                             | Metoprolol                             |
|                                              | Morphine                               |
|                                              | Nalbuphine                             |
|                                              | Naloxone                               |
|                                              | Promethazine                           |
|                                              | Sodium bicarbonate                     |

\*Additional contents of enhanced emergency medical kits are airline-specific and may exceed or deviate from the contents listed. This list includes contents in some kits of airlines that were involved in this study.

## REFERENCE

1. Policy AC121-33B - Emergency Medical Equipment. Federal Aviation Administration. 2006. (Accessed June 16, 2012, at [http://www.faa.gov/regulations\\_policies/advisory\\_circulars/index.cfm/go/document.information/documentID/22516](http://www.faa.gov/regulations_policies/advisory_circulars/index.cfm/go/document.information/documentID/22516).)
